# Supplementary material
Source: Springer Nature journal article supplement (https://www.springermedizin.de/resource/supplementary/13058_2009_2413_MOESM3_ESM.pdf/9701360)
Supplement: MOESM3 [file 9701360]

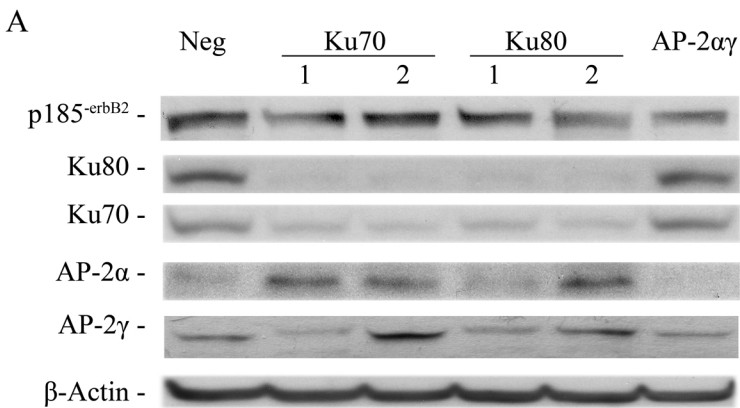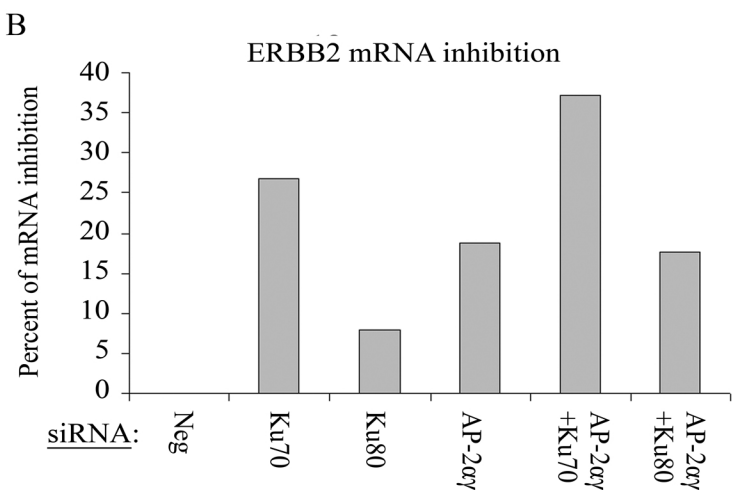

**Additional data file 3 : Effect of Ku70 / Ku80 and AP-2 deregulation on ERBB2 mRNA and protein expression in SKBR3 cells.**

**A.** Immunoblot analysis of p185erbB2, Ku70, Ku80, AP-2α, AP-2γ and beta-actin (β-Actin) protein expression from cells (SKBR3) transfected with two different Ku70 or Ku80 siRNA (see above), compared to the negative siRNA (Neg) and AP-2α and AP-2γ siRNAs (AP-2αγ). **B.** Real-time RT-PCR on the ERBB2 mRNA from SKBR3 cells transfected with different siRNAs (see down). Ku siRNA were combined with AP-2αγ or not. The graph represents the percentage of ERBB2 mRNA expression inhibition compared to the Neg siRNA condition. ERBB2 mRNA expression was corrected on the beta-2-microglobulin mRNA expression.
